# Supplementary material for: Functional Homologous Recombination Assay on FFPE Specimens of Advanced High-Grade Serous Ovarian Cancer Predicts Clinical Outcomes
Source: PubMed Central journal article supplement (PMC10425726; doi:10.1158/1078-0432.ccr-22-3156), 2023-02-20
Supplement: ccr-22-3156_supplementary_figure_s1_suppfs1.pdf [file ccr-22-3156_supplementary_figure_s1_suppfs1.pdf]

## Supplementary figure S1.

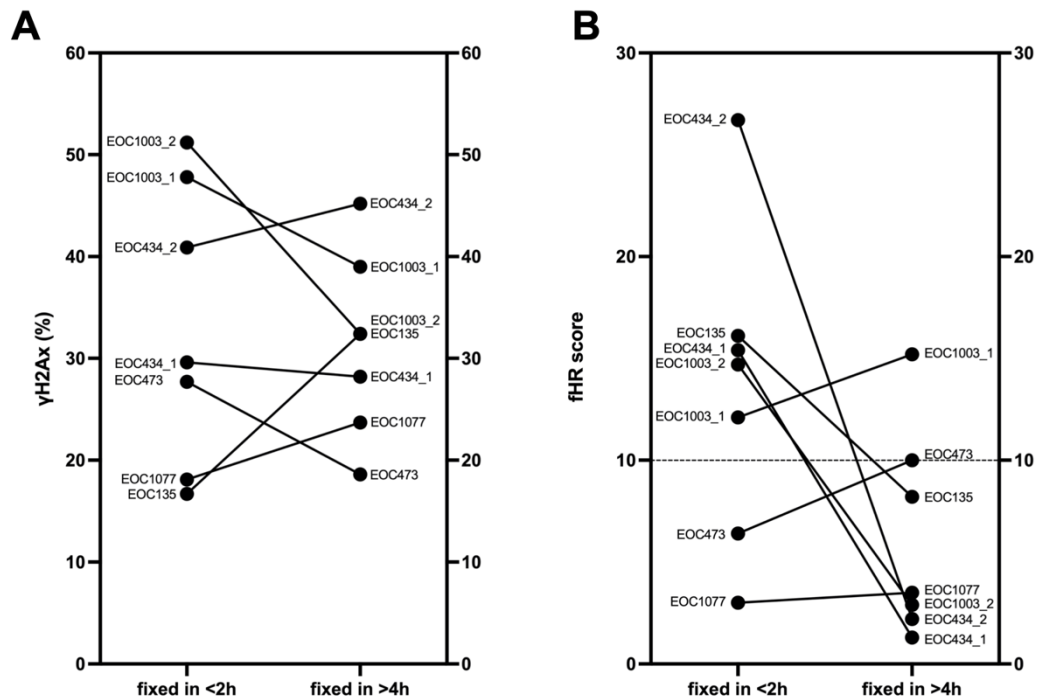

*Supplementary figure 1. Time-to-fixation of HGSC tumor specimens can alter  $\gamma$ H2Ax positivity and fHR score. Two pieces of the same (chemo-naïve) tumors,  $n=7$ , were fixed within <2 hours and >4 hours after surgical resection. **A.** Amount of DNA damage, marked by  $\gamma$ H2Ax. **B.** Functional HR score analyzed from the paired samples with <2h to fixation and >4h to fixation. Dashed line indicates fHRD cut-off value (10% for chemo-naïve tumors). Four out of seven samples display a substantial drop in fHR score upon extended time-to-fixation.*
