# Supplementary material for: Functional Homologous Recombination Assay on FFPE Specimens of Advanced High-Grade Serous Ovarian Cancer Predicts Clinical Outcomes
Source: PubMed Central journal article supplement (PMC10425726; doi:10.1158/1078-0432.ccr-22-3156), 2023-02-20
Supplement: ccr-22-3156_supplementary_figure_s5.suppfs5.pdf [file ccr-22-3156_supplementary_figure_s5.suppfs5.pdf]

## Supplementary figure S5.

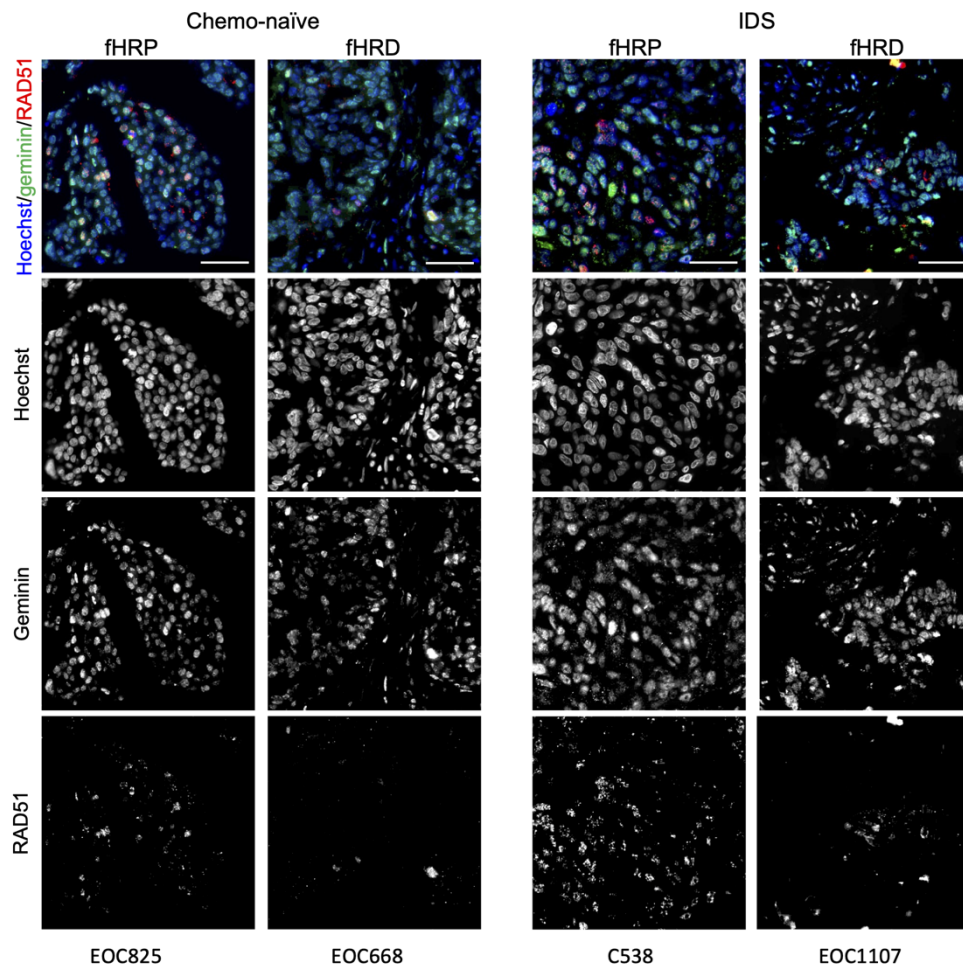

*Supplementary figure S5. Example images of staining patterns in chemo-naïve and IDS (NACT-treated) geminin-RAD51 double stained specimens classified as fHRD or fHRP. Scale bar 50µm.*
