# Supplementary material for: Functional Homologous Recombination Assay on FFPE Specimens of Advanced High-Grade Serous Ovarian Cancer Predicts Clinical Outcomes
Source: PubMed Central journal article supplement (PMC10425726; doi:10.1158/1078-0432.ccr-22-3156), 2023-02-20
Supplement: ccr-22-3156_supplementary_figure_s6_suppfs6.pdf [file ccr-22-3156_supplementary_figure_s6_suppfs6.pdf]

## Supplementary figure S6.

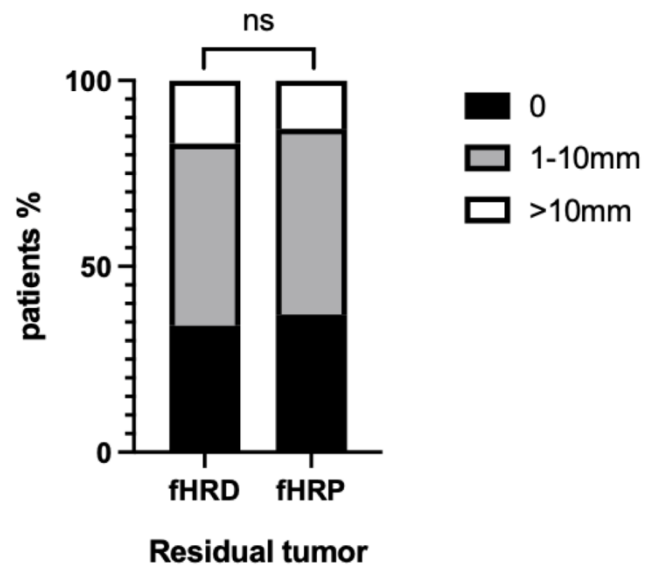

*Supplementary figure S6. Comparison between the success of cytoreduction in fHRD and fHRP groups (Chi-squared test).*
