# Supplementary material for: Functional Homologous Recombination Assay on FFPE Specimens of Advanced High-Grade Serous Ovarian Cancer Predicts Clinical Outcomes
Source: PubMed Central journal article supplement (PMC10425726; doi:10.1158/1078-0432.ccr-22-3156), 2023-02-20
Supplement: ccr-22-3156_supplementary_figure_s7_suppfs7.pdf [file ccr-22-3156_supplementary_figure_s7_suppfs7.pdf]

## Supplementary figure S7.

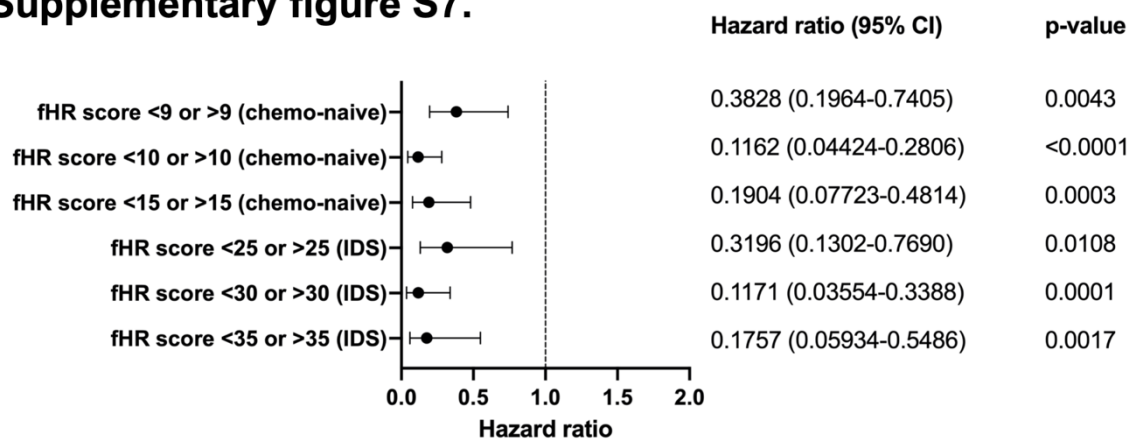

*Supplementary figure S7. Hazard ratio analysis with different cut-off values for fHR score and PFI (Cox proportional hazard regression).*
