# Supplementary material for: Functional Homologous Recombination Assay on FFPE Specimens of Advanced High-Grade Serous Ovarian Cancer Predicts Clinical Outcomes
Source: PubMed Central journal article supplement (PMC10425726; doi:10.1158/1078-0432.ccr-22-3156), 2023-02-20
Supplement: ccr-22-3156_supplementary_figure_s8_suppfs8.pdf [file ccr-22-3156_supplementary_figure_s8_suppfs8.pdf]

# Supplementary figure S8.

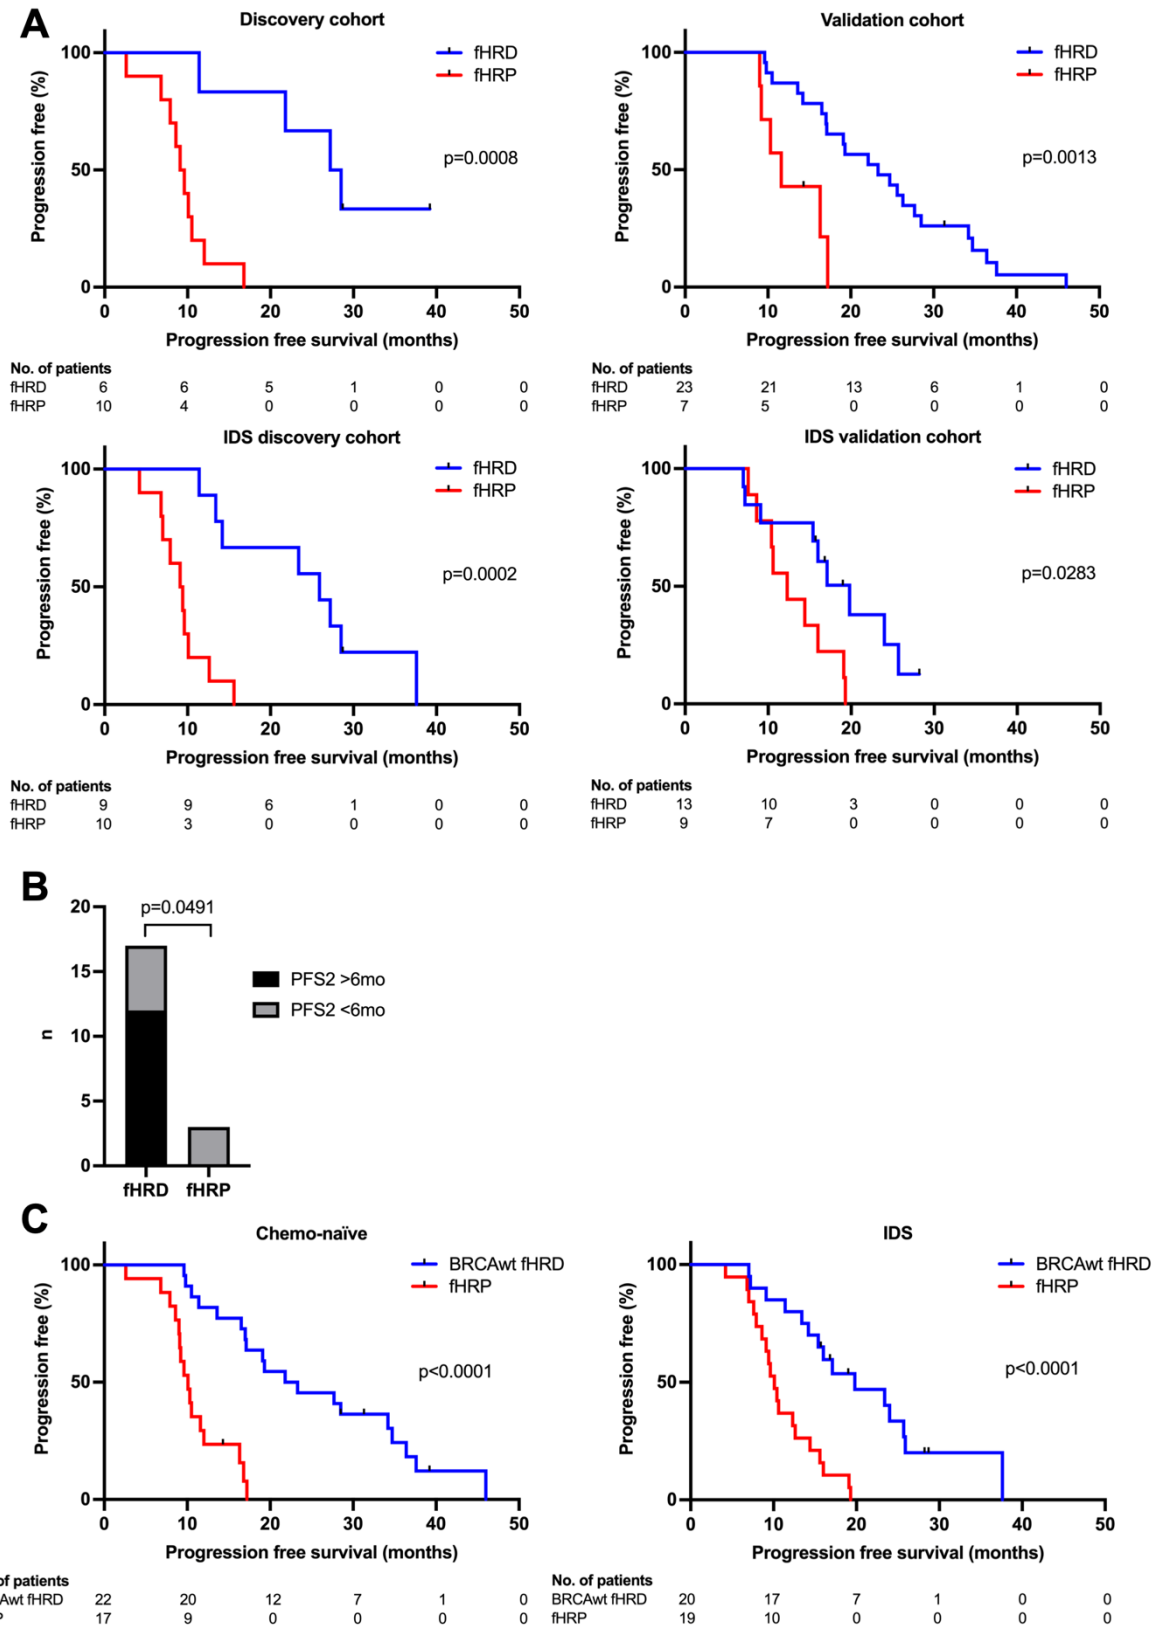

**Supplementary figure S8. Progression free survival in the different cohorts.** **A.** PFS shown separately in discovery and validation cohorts of chemo-naïve specimens, as well as discovery and validation cohorts of IDS specimens (Log-rank, Mantel-Cox test). **B.** Response to second-line platinum treatment in fHRD (n=17) and fHRP (n=3) groups (Fisher's exact). **C.** PFS in chemo-naïve and IDS cohorts without BRCAmut fHRD patients (Log-rank, Mantel-Cox test).
